# Supplementary material for: Treatment failure in giant cell arteritis
Source: HighWire-hosted journal article supplement (doi:10.1136/annrheumdis-2021-220347), 2021-05-28
Supplement: annrheumdis-2021-220347supp001_data_supplement.pdf [file annrheumdis-2021-220347supp001_data_supplement.pdf]

## SUPPLEMENTARY MATERIAL

### List of investigators

#### Belgium

|                        |          |
|------------------------|----------|
| Daniel Blockmans       | Leuven   |
| Frédéric Vandergheynst | Brussels |

#### Canada

|                |        |
|----------------|--------|
| Frederic Morin | Quebec |
|----------------|--------|

#### Denmark

|                    |          |
|--------------------|----------|
| Jesper Noerregaard | Hillerod |
|--------------------|----------|

#### France

|                            |           |
|----------------------------|-----------|
| Valerie Devauchelle Pensec | Brest     |
| Eric Hachulla              | Lille     |
| Gilles Kaplanski           | Marseille |
| Pierre Kieffer             | Mulhouse  |
| Claire Larroche            | Bobigny   |
| Alexis Regent              | Paris     |

#### Germany

|                        |               |
|------------------------|---------------|
| Rieke H.-E. Alten      | Berlin        |
| Martin Aringer         | Dresden       |
| Juergen Braun          | Herne         |
| Martin Fleck           | Bad Abbach    |
| Bernhard Hellmich      | Plochingen    |
| Joerg Christoph Henes  | Tübingen      |
| Jan Leipe              | Munich        |
| Frank Moosig           | Bad Bramstedt |
| Thomas Neumann         | Jena          |
| Juergen Rech           | Erlangen      |
| Reinhold Ernst Schmidt | Hannover      |
| Andreas Schwarting     | Mainz         |
| Reinhard Voll          | Freiburg      |

#### Italy

|                        |               |
|------------------------|---------------|
| Silvano Adami          | Verona        |
| Stefano Bombardieri    | Pisa          |
| Marco Amedeo Cimmino   | Genova        |
| Salvatore de Vita      | Udine         |
| Amelia Ruffatti        | Padova        |
| Maria Grazia Sabbadini | Milano        |
| Carlo Salvarani        | Reggio Emilia |

#### Netherlands

|                      |           |
|----------------------|-----------|
| Amanda J. W. Branten | Arnhem    |
| Elisabeth Brouwer    | Groningen |

Edgar M. Colin  
M. Vonk  
Alexandre Voskuyl

Almelo  
Nijmegen  
Amsterdam

**Norway**

Maud-Kristine Ljoså  
Geirmund Myklebust  
Øyvind Palm

Ålesund  
Kristiansand  
Oslo

**Poland**

Marek Brzosko  
Slawomir Jeka

Szczecin  
Bydgoszcz

**Portugal**

António Marinho

Porto

**Spain**

Eduardo Ucar Angulo  
Maria C. Cid  
Francisco Javier Blanco Garcia  
Francisco Javier Narvaez Garcia  
Federico Diaz Gonzalez

Bilbao  
Barcelona  
A Coruna  
Barcelona  
La Laguna

**Sweden**

Peter Matt  
Alladin Mohammad  
Elisabeth Nordborg  
Elke Theander  
Ronald van Vollenhoven

Uppsala  
Lund  
Goteborg  
Malmö  
Stockholm

**United Kingdom**

Adewale Adebajo  
Neil Basu  
Paul Byrne  
Bhaskar Dasgupta  
David Hutchinson  
Neil McKay  
Susan Mollan  
Ann Morgan  
Pamela Peterson  
Gordon Plant  
Euthalia Roussou

Barnsley  
Aberdeen  
Colchester  
Westcliffe-on-Sea  
Truro  
Edinburgh  
Birmingham  
Leeds  
Newcastle upon Tyne  
London  
Romford

**United States of America**

Vera Bocoun  
Lindsay Forbess  
Joseph Z. Forstot  
Daniel E Furst  
William Gough  
Jeffrey Kaine

Wausau  
Los Angeles  
Boca Raton  
Los Angeles  
Asheville  
Sarasota

Brian Keroack  
Curry Koenig  
Eric Matteson  
Peter Merkel  
Christopher Phillips  
Robert Spiera  
John H. Stone  
Andrew Sulich  
Sebastian Unizony

Portland  
Salt Lake City  
Rochester  
Philadelphia  
Paducah  
New York  
Boston  
St. Claire Shores  
Boston

**Box 1** Parameters tested as predictors of treatment failure**1. Patient-related features**

Age

Sex

Race

Body mass index

**2. Disease-related features***At the time of GCA diagnosis*

Headaches

Scalp tenderness

Jaw claudication

GCA-related vision loss

Polymyalgia rheumatica symptoms

Temporal artery biopsy positive

Imaging demonstrating lesions compatible with large vessel vasculitis<sup>a</sup>*At study baseline*

New-onset disease

Disease duration

Erythrocyte sedimentation rate

C-reactive protein level

**3. Treatment-related features**

Baseline prednisone dose

**4. Patient-reported outcomes**

Patient Global Assessment of Disease Activity

Functional Assessment of Chronic Illness Therapy–Fatigue score

36-Item Short Form Survey physical component summary

36-Item Short Form Survey mental component summary

EuroQol-5D score

<sup>a</sup>Imaging included computed tomography angiography, magnetic resonance angiography, and positron emission tomography

**Table 1** GiACTA study definitions of patient-reported outcomes

| Instrument                                                                    | Description                                                                                                                                                                                                                                                                                                                                                                                                                                                                        |
|-------------------------------------------------------------------------------|------------------------------------------------------------------------------------------------------------------------------------------------------------------------------------------------------------------------------------------------------------------------------------------------------------------------------------------------------------------------------------------------------------------------------------------------------------------------------------|
| <b>Patient Global Assessment of Disease Activity (PtGA)</b>                   | <p>The PtGA score reflects patients' perceptions of their disease activity,<sup>1</sup> which is marked on a numerical scale (0-100 mm). Higher numbers indicate perception that disease activity is worse.</p>                                                                                                                                                                                                                                                                    |
| <b>Functional Assessment of Chronic Illness Therapy (FACIT)–Fatigue scale</b> | <p>The FACIT-Fatigue scale is a 13-item tool that measures a patient's level of fatigue during their usual daily activities in the past week.<sup>2</sup> Fatigue and its impact on physical activity, functionality and social interactions are measured on a four-point Likert scale. The FACIT-Fatigue scale ranges from 0 to 52. Lower numbers indicate worse fatigue and greater impact of fatigue on physical, functional and social outcomes.</p>                           |
| <b>36-Item Short Form Survey (SF-36)</b>                                      | <p>The SF-36 is a 36-item, patient-reported survey of functional health and well-being that captures data related to eight health domains (physical functioning, bodily pain, role limitations due to physical health problems, role limitations due to emotional problems, emotional well-being, social functioning, energy/fatigue and perception of general health).<sup>3</sup> The SF-36 scores range from 0 to 100. Lower scores indicate less favourable health states.</p> |

|                                 |                                                                                                                                                                                                                                                                                                                                                |
|---------------------------------|------------------------------------------------------------------------------------------------------------------------------------------------------------------------------------------------------------------------------------------------------------------------------------------------------------------------------------------------|
| <b>EuroQol-5D (EQ-5D) score</b> | The EQ-5D is a standardised instrument for measuring generic health status that gathers data regarding patient mobility, self-care, pain, depression/anxiety and usual activities (e.g. work, study, housework and family or leisure activities). <sup>4</sup> The EQ-5D score ranges from 0 to 1. Lower numbers indicate worse health status. |
|---------------------------------|------------------------------------------------------------------------------------------------------------------------------------------------------------------------------------------------------------------------------------------------------------------------------------------------------------------------------------------------|

**Table 2** Causes of nonresponse to treatment

| Cause, n (%)                                          | PBO/PDN<br>N=101       | TCZ/PDN<br>N=149       |
|-------------------------------------------------------|------------------------|------------------------|
| <b>Treatment failure</b>                              | 67 (66.3)              | 44 (29.5)              |
| Refractory disease                                    | 31 (30.7)              | 18 (12.1)              |
| Disease relapse                                       | 36 (35.6) <sup>†</sup> | 26 (17.4) <sup>‡</sup> |
| <b>Other</b>                                          | 7 (6.9)                | 19 (12.8)              |
| Treatment discontinuation because of an adverse event | 3 (3.0)                | 8 (5.4)                |
| Nonadherence to the protocol prednisone taper         | 1 (1)                  | 4 (2.7)                |
| Study withdrawal before week 52                       | 2 (5.2)                | 4 (2.7)                |
| Miscellaneous*                                        | 1 (1)                  | 3 (2.0)                |

\*Miscellaneous reasons included protocol violation and protocol noncompliance.

<sup>†</sup>Relapse in eight patients was based on isolated elevation of erythrocyte sedimentation rate.

<sup>‡</sup>Relapse in one patient was based on isolated elevation of erythrocyte sedimentation rate.

PBO/PDN, placebo + prednisone; TCZ/PDN, tocilizumab + prednisone.

## REFERENCES

- 1 Nikiphorou E, Radner H, Chatzidionysiou K, *et al.* Patient global assessment in measuring disease activity in rheumatoid arthritis: a review of the literature. *Arthritis Res Ther* 2016;18:251.
- 2 Yellen SB, Cella DF, Webster K, Blendowski C, Kaplan E. Measuring fatigue and other anemia-related symptoms with the Functional Assessment of Cancer Therapy (FACT) measurement system. *J Pain Symptom Manage* 1997;13:63-74.
- 3 Ware JE Jr, Sherbourne CD. The MOS 36-item short-form health survey (SF-36), I: conceptual framework and item selection. *Med Care* 1992;30:473-83.
- 4 EuroQol G. EuroQol—a new facility for the measurement of health-related quality of life. *Health Policy* 1990;16:199-208.
